# Supplementary material for: Epidemiology and Assessment of Traumatic Spinal Cord Injury With Concomitant Brain Injury: An Observational Study in a Regional Trauma Center
Source: PubMed Central journal article supplement — Ann Rehabil Med. 2023 Oct 12;47(5):385–92. doi: 10.5535/arm.23054 (PMC10620491; doi:10.5535/arm.23054), 2023-10-12
Supplement: arm-23054-Supplementary-Table-1.pdf [file arm-23054-Supplementary-Table-1.pdf]

**Supplementary Table S1.** Study characteristics in SCI with TBI patients

| Variable                  | SCI+TBI (n=74) | Concomitant TBI severity |                 |               |
|---------------------------|----------------|--------------------------|-----------------|---------------|
|                           |                | Mild (n=12)              | Moderate (n=40) | Severe (n=22) |
| <b>Sex</b>                |                |                          |                 |               |
| Male                      | 58 (78.4)      | 7 (58.3)                 | 32 (80.0)       | 19 (86.4)     |
| Female                    | 16 (21.6)      | 5 (41.7)                 | 8 (20.0)        | 3 (13.6)      |
| <b>Age (yr)</b>           |                |                          |                 |               |
| 0-15                      | 1 (1.3)        | 0 (0)                    | 1 (2.5)         | 0 (0)         |
| 16-30                     | 6 (8.1)        | 2 (16.7)                 | 3 (7.5)         | 1 (4.5)       |
| 31-45                     | 7 (9.5)        | 2 (16.7)                 | 4 (10.0)        | 1 (4.5)       |
| 46-60                     | 23 (31.1)      | 3 (25.0)                 | 10 (25.0)       | 10 (45.5)     |
| 61-75                     | 25 (33.8)      | 4 (33.3)                 | 14 (35.0)       | 7 (31.8)      |
| >75                       | 12 (16.2)      | 1 (8.3)                  | 8 (20.0)        | 3 (13.7)      |
| <b>Initial NLI</b>        |                |                          |                 |               |
| C1-4                      | 32 (43.2)      | 6 (50.0)                 | 11 (27.5)       | 15 (68.2)     |
| C5-8                      | 14 (18.9)      | 2 (16.7)                 | 11 (27.5)       | 1 (4.5)       |
| T1-12                     | 15 (20.3)      | 3 (25.0)                 | 8 (20.0)        | 4 (18.2)      |
| L1-S5                     | 3 (4.1)        | 1 (8.3)                  | 2 (5.0)         | 0 (0)         |
| Unknown                   | 10 (13.5)      | 0 (0)                    | 8 (20.0)        | 2 (9.1)       |
| <b>Initial AIS</b>        |                |                          |                 |               |
| A                         | 25 (33.8)      | 5 (41.7)                 | 11 (27.5)       | 9 (40.9)      |
| B                         | 3 (4.0)        | 0 (0.0)                  | 1 (2.5)         | 2 (9.1)       |
| C                         | 21 (28.4)      | 3 (25.0)                 | 13 (32.5)       | 5 (22.7)      |
| D                         | 15 (20.3)      | 4 (33.3)                 | 7 (17.5)        | 4 (18.2)      |
| Unknown                   | 10 (13.5)      | 0 (0)                    | 8 (20.0)        | 2 (9.1)       |
| <b>Traumatic etiology</b> |                |                          |                 |               |
| Fall                      | 41 (55.4)      | 8 (66.7)                 | 24 (60.0)       | 9 (40.9)      |
| Transport                 | 32 (43.2)      | 4 (33.3)                 | 16 (40.0)       | 12 (54.6)     |
| Others                    | 1 (1.4)        | 0 (0)                    | 0 (0)           | 1 (4.5)       |

Values are presented as number (%).

SCI, spinal cord injury; TBI, traumatic brain injury; NLI, neurologic level of injury; AIS, American Spinal Injury Association Impairment Scale.
