# Supplementary material for: Epidemiology and Assessment of Traumatic Spinal Cord Injury With Concomitant Brain Injury: An Observational Study in a Regional Trauma Center
Source: PubMed Central journal article supplement — Ann Rehabil Med. 2023 Oct 12;47(5):385–92. doi: 10.5535/arm.23054 (PMC10620491; doi:10.5535/arm.23054), 2023-10-12
Supplement: arm-23054-Supplementary-Table-2.pdf [file arm-23054-Supplementary-Table-2.pdf]

**Supplementary Table S2.** NLI and AIS conversion of initial AIS A in SCI with concomitant TBI

| Sex    | Age (yr) | TBI severity | NLI conversion | AIS conversion |
|--------|----------|--------------|----------------|----------------|
| Male   | 56       | Severe       | C3 → C4        | C              |
| Male   | 52       | Severe       | C4 → C4        | C              |
| Male   | 53       | Severe       | C3 → C3        | B              |
| Male   | 43       | Severe       | C4 → C4        | B              |
| Male   | 49       | Severe       | C4 → C4        | B              |
| Male   | 71       | Moderate     | C3 → C4        | C              |
| Male   | 64       | Moderate     | C4 → C4        | C              |
| Male   | 80       | Moderate     | C5 → C5        | C              |
| Female | 21       | Moderate     | T11 → T12      | B              |
| Female | 8        | Moderate     | T2 → T2        | B              |
| Male   | 52       | Mild         | C4 → C5        | C              |
| Female | 26       | Mild         | C5 → C5        | C              |
| Female | 70       | Mild         | T12 → L1       | B              |
| Male   | 41       | Mild         | T3 → T3        | B              |

NLI, neurological level of injury; AIS, American Spinal Injury Association Impairment Scale; SCI, spinal cord injury; TBI, traumatic brain injury.
