# Supplementary material for: Epidemiology and Assessment of Traumatic Spinal Cord Injury With Concomitant Brain Injury: An Observational Study in a Regional Trauma Center
Source: PubMed Central journal article supplement — Ann Rehabil Med. 2023 Oct 12;47(5):385–92. doi: 10.5535/arm.23054 (PMC10620491; doi:10.5535/arm.23054), 2023-10-12
Supplement: arm-23054-Supplementary-Table-3.pdf [file arm-23054-Supplementary-Table-3.pdf]

**Supplementary Table S3.** Consideration points about arousal and awareness in the ISNCSCI worksheet

| Category           | Evaluation tool | Use time | Limitation for evaluation                          |
|--------------------|-----------------|----------|----------------------------------------------------|
| Arousal            | GCS             | 30 s     |                                                    |
| Agitation/sedation | RASS            | 30 s     |                                                    |
| Awareness          | MMSE            | 3 min    | Endotracheal intubation, tracheostomy, tetraplegia |
|                    | MoCA            | 5 min    |                                                    |
| Delirium           | CAM-ICU         | 3 min    | Endotracheal intubation, tracheostomy              |

ISNCSCI, International Standards for Neurological Classification of Spinal Cord Injury; GCS, Glasgow Coma Scale; RASS, Richmond Agitation-Sedation Scale; MMSE, mini-mental state examination; MoCA, Montreal Cognitive Assessment; CAM-ICU, Confusion Assessment Method for Intensive Care Unit.
